# Supplementary material for: Modulation of Chitosan-TPP Nanoparticle Properties for Plasmid DNA Vaccines Delivery
Source: MDPI journal article supplement (doi:10.3390/polym14071443), 2022-04-01
Supplement: s1 [file s1]

# Supplementary Material: Modulation of chitosan-TPP nanoparticle properties for plasmid DNA vaccines delivery

Renato Nunes, Ana Sofia Serra, Aiva Simaite, and Ângela Sousa

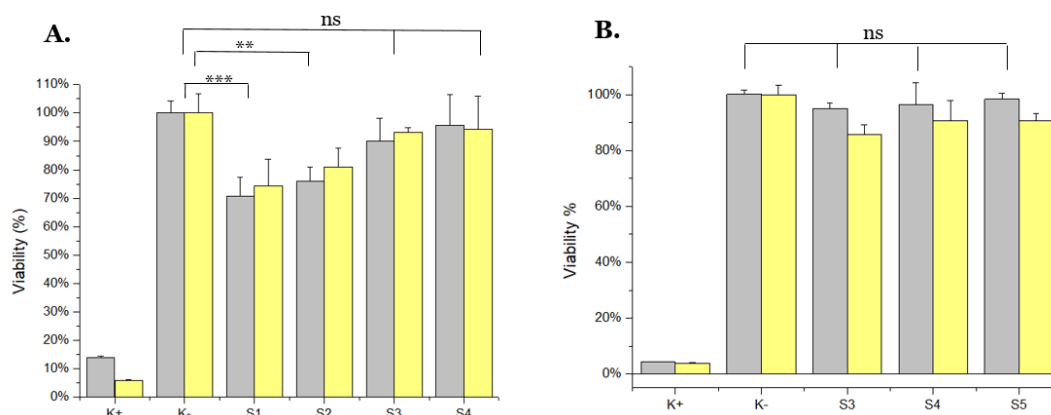

**Figure S1.** Cell viability after 24 h (gray) and 48 h (yellow) of transfection with CS-TPP-pDNA polyplexes, for hFIB cells (A) and for RAW cells (B). S1 – NPs centrifuged at 2000 rpm, DNA concentration of 20 µg/mL; S2 – NPs centrifuged at 4000 rpm, DNA concentration of 20 µg/mL; S3 – NPs centrifuged at 6000 rpm, DNA concentration of 20 µg/mL. S4 – NPs centrifuged at 10000 rpm, 10 min, DNA concentration of 20 µg/mL; S5 – NPs centrifuged at 10000 rpm, DNA concentration of 60 µg/mL. Non-transfected cells were used as negative control (K-) and ethanol treated cells were used as positive control (K+) for cytotoxicity. Statistical analysis was made using “one-way ANOVA” with data obtained from three independent measurements (mean ± SD, n = 3). The asterisks symbol represents statistical significance (\*\* p ≤ 0.01; \*\*\* p ≤ 0.001), ns – not significant).
